# Supplementary material for: Light, but Not Nutrients, Drives Seasonal Congruence of Taxonomic and Functional Diversity of Phytoplankton in a Eutrophic Highland Lake in China
Source: Front Plant Sci. 2020 Mar 5;11:179. doi: 10.3389/fpls.2020.00179 (PMC7067047; doi:10.3389/fpls.2020.00179)
Supplement: Supplementary file 2 [file Table_1.xlsx]

## Sheet: 1
Annual mean value of phytoplankton cell density in erhai lake (cells·L-1)
species	Genus	FG	MFG	MBFG	2012	2013	2014
Achnanthes spp.	Achnanthes	MP	7b	Ⅵ	1426.83	26768.2	0
Amphora ovalis	Amphora	A	7b	Ⅵ	237.127	0	0
Asterionella formosa	Asterionella	C	6c	Ⅵ	120246	214825	65777.8
Aulacoseira granulata	Aulacoseira	B	6a	Ⅵ	0	150.455	0
Cocconeis placentula	Cocconeis	A	7b	Ⅵ	11648.9	764.548	69.8623
Cyclotella meneghiniana	Cyclotella	A	7a	Ⅵ	509994	337483	275321
Cymbella tumida	Cymbella	P	7b	Ⅵ	2910.65	299.681	522.626
Fragilaria capucina	Fragilaria	P	6c	Ⅵ	420943	257858	195167
Fragilaria brevistriata	Fragilaria	P	6c	Ⅵ	0	0	2436.01
Frustulia vulgaris	Frustulia	A	7b	Ⅵ	38.4242	0	40.1359
Gomphonema spp.	Gomphonema	A	7b	Ⅵ	1102.92	123.866	0
Hyalodiscus subtilis	Hyalodiscus	A	7a	Ⅵ	0	0	2126.75
Melosira varians	Melosira	TB	6a	Ⅵ	284343	333659	168761
Melosira granulata	Melosira	TB	6a	Ⅵ	0	2583.34	1983.09
Melosira granulata var. angustissima	Melosira	TB	6a	Ⅵ	0	0	3073.94
Navicula spp.	Navicula	TB	7b	Ⅵ	11181.5	2788.64	8745.33
Nitzschia acicularis	Nitzschia	D	7b	Ⅵ	223.08	177.785	108.615
Pinnularia gibba	Pinnularia	A	7b	Ⅵ	0	0	199.606
Stephanodiscus	Stephanodiscus	B	6a	Ⅵ	2484.65	30645.4	5927.6
Surirella capronii	Surirella	TB	6b	Ⅵ	0	101.108	139.725
Synedra acus	Synedra	D	6b	Ⅵ	561.883	445.771	30615.2
Synedra acus var. angustissima	Synedra	D	6b	Ⅵ	0	0	618.78
Synedra ulna	Synedra	D	6b	Ⅵ	0	0	139.725
Synedra amphicephala	Synedra	D	6b	Ⅵ	0	0	80.2717
Anabaena bergii	Anabaena	SN	5e	Ⅲ	0	0	146920
Anabaena flos-aquae	Anabaena	SN	5e	Ⅲ	146405	157250	2794.49
Anabaena spiroides	Anabaena	SN	5e	Ⅲ	0	1728.04	1822.71
Aphanizomenon flos-aquae	Aphanizomenon	H1	5e	Ⅲ	629721	281072	276025
Aphanizomenon spp.	Aphanizomenon	K	5e	Ⅳ	0	390450	349.311
Aphanothece spp.	Aphanothece	K	5d	Ⅳ	7578.66	0	2628.78
Chroococccus tenax	Chroococccus	TC	5d	Ⅳ	19951.2	23238.7	1953.01
Dactylococcopsis rhaphidioides	Dactylococcopsis	TC	5d	Ⅰ	108372	9540.98	523.967
Gloeocapsa ralfsiana	Gloeocapsa	TC	5d	Ⅳ	1115.93	2011.31	2324.48
Lyngbya spp.	Lyngbya	TC	5e	Ⅳ	0	0	2864.35
Merismopedia elegans	Merismopedia	Lo	5d	Ⅳ	29803	7170.46	3493.11
Microcystis spp.	Microcystis	M	5b	Ⅶ	7.7438e+06	3.37035e+06	4.39182e+06
Oscillatoria princes	Oscillatoria	S2	5a	Ⅲ	0	0	88585.3
Oscillatoria spp.	Oscillatoria	S1	5a	Ⅲ	1.13393e+06	254498	88585.3
Phormidium tenue	Phormidium	S1	5a	Ⅲ	0	20157	486.004
Planktolyngbya spp.	Planktolyngbya	S1	5a	Ⅲ	230968	9955.59	0
Pseudanabaena spp.	Pseudanabaena	S1	5a	Ⅲ	748002	206717	357895
Raphidiopsis curvata	Raphidiopsis	S1	5d	Ⅰ	246.381	66.6346	0
Ankistrodesmus falcatus	Ankistrodesmus	X1	9b	Ⅰ	29567	2398.87	1331.72
Carteria spp.	Carteria	Wo	9b	Ⅲ	2704.09	0	0
Characium spp.	Characium	Wo	9b	Ⅲ	2348.93	16875	0
Chlamydomonas spp.	Chlamydomonas	Wo	3a	Ⅲ	125518	80336.4	209.587
Chlamydomonas globosa	Chlamydomonas	Wo	3a	Ⅲ	0	446.392	3391.41
Chlamydomonas microsphaerella	Chlamydomonas	Wo	3a	Ⅲ	0	0	313.43
Chlorella vulgaris	Chlorella	X1	9b	Ⅲ	172117	79510	9352.93
Chlorogonium spp.	Chlorogonium	Wo	9b	Ⅲ	210.579	55.8432	0
Chodatella longiseta	Chodatella	X1	9b	Ⅲ	3719.1	4499.57	1366.66
Chodatella wratislaviensis	Chodatella	X1	9b	Ⅲ	0	0	69.8623
Closterium aciculare	Closterium	P	9a	Ⅲ	3391.67	1353.09	0
Closterium parvulum	Closterium	P	9a	Ⅲ	0	697.665	7754.39
Closterium gracile	Closterium	P	9a	Ⅲ	0	0	138.027
Closterium dejectum	Closterium	P	8a	Ⅳ	69.8623	191.646	4472.43
Coelastrum sphaerium	Coelastrum	J	9a	Ⅳ	40352.5	23202.4	2661.12
Cosmarium blyttii	Cosmarium	N	9a	Ⅳ	0	100.043	0
Crucigenia lauterbornii	Crucigenia	J	11a	Ⅰ	0	900.552	3912.29
Crucigenia apiculata	Crucigenia	J	11a	Ⅰ	8455.82	5191.98	419.174
Dictyosphaerium spp.	Dictyosphaerium	J	11a	Ⅳ	30244.3	8546.83	0
Elakatothrix gelatinosa	Elakatothrix	F	9b	Ⅰ	37751	4561.57	4846.78
Eudorina elegans	Eudorina	F	3b	Ⅶ	47145.8	3760.06	8104.02
Eudorina unicocca	Eudorina	F	3b	Ⅶ	0	0	2026.01
Golenkinia radiata	Golenkinia	X1	9b	Ⅰ	1031.02	1262.6	0
Gonatozygon spp.	Gonatozygon	F	8a	Ⅳ	29440.5	2098.15	1701.82
Kirchneriella contorta	Kirchneriella	F	9b	Ⅰ	0	0	199.606
Kirchneriella obesa	Kirchneriella	F	9b	Ⅰ	7487.46	3141.24	435.354
Monoraphidium arcuatum	Monoraphidium	X1	9b	Ⅰ	9715.72	2186.68	0
Mougeotia spp.	Mougeotia	T	10b	Ⅳ	1.1851e+06	565995	366404
Nephrocytium spp.	Nephrocytium	F	9b	Ⅰ	58833.5	5592.47	5582.95
Oedogoniaecae spp.	Oedogoniaecae	F	10a	Ⅳ	0	144.978	7935.71
Oocystis borgei	Oocystis	F	11a	Ⅳ	115960	27652.7	19840.3
Oocystis lacustris	Oocystis	F	11a	Ⅳ	0	288.112	23073.9
Oocystis elliptica	Oocystis	F	11a	Ⅳ	0	0	141.234
Pandorina morum	Pandorina	G	3b	Ⅶ	2727.42	707.285	9776.27
Pediastrum biwae	Pediastrum	J	11a	Ⅳ	0	0	7195.81
Pediastrum boryanum	Pediastrum	J	11a	Ⅳ	0	0	6182.81
Pediastrum biwae var. triangulatum	Pediastrum	J	11a	Ⅳ	0	0	1746.56
Pediastrum duplex	Pediastrum	J	11a	Ⅳ	85793.5	27676.3	3982.15
Pediastrum duplex var. gracillimum	Pediastrum	J	11a	Ⅳ	0	0	3073.94
Pediastrum simplex	Pediastrum	J	11a	Ⅳ	0	2522.56	4747.22
Pediastrum biradiatum	Pediastrum	J	11a	Ⅳ	0	0	558.898
Pediastrum tetra	Pediastrum	J	11a	Ⅳ	0	0	161.298
Phacotus lenticularis	Phacotus	XPh	3a	Ⅰ	11314.5	7741.6	0
Planctonema spp.	Planctonema	T	10a	Ⅳ	0	0	12326.8
Psephonema spp.	Psephonema	T	10a	Ⅳ	5.3983e+06	1.4229e+06	2.44472e+06
Quadricoccus spp.	Quadricoccus	T	11a	Ⅳ	1993.8	513.138	0
Scenedesmus bijuga	Scenedesmus	J	11a	Ⅳ	0	289.621	27904.8
Scenedesmus dimorphus	Scenedesmus	J	11a	Ⅳ	0	0	279.449
Scenedesmus quadricanda	Scenedesmus	J	11a	Ⅳ	195048	51809.6	12376.2
Scenedesmus perforatus	Scenedesmus	J	11a	Ⅳ	0	0	1327.38
Scenedesmus wuhanensis	Scenedesmus	J	11a	Ⅳ	0	410.762	5785.01
Scenedesmus arcuatus	Scenedesmus	J	11a	Ⅳ	0	0	1641.71
Schroederia setigera	Schroederia	X3	9b	Ⅰ	2107.24	692.731	0
Selenastrum gracile	Selenastrum	X3	9b	Ⅰ	34650.1	4867.61	39.5979
Sphaerocystis schroeteri	Sphaerocystis	F	11a	Ⅳ	4377.59	2463.22	3647.69
Spirogyra spp.	Spirogyra	N	10b	Ⅳ	0	0	1631.86
Staurastrum dejectum	Staurastrum	N	8a	Ⅳ	0	82.5492	0
Staurastrum gracile	Staurastrum	N	8a	Ⅳ	3143.9	830.131	2383.94
Tetraedron minimum	Tetraedron	J	9b	Ⅰ	21473.3	4954.73	3699.09
Tetraedron bifurcatum	Tetraedron	J	9b	Ⅰ	0	0	244.518
Tetraedron trilobulatum	Tetraedron	J	9b	Ⅰ	0	0	139.725
Tetraedron trigomum	Tetraedron	J	9b	Ⅰ	0	0	317.556
Ulothrix spp.	Ulothrix	MP	10a	Ⅳ	83062.4	60264.4	1816.42
Westella botryoides	Westella	E	11b	Ⅳ	13805.6	4977.53	1015.55
Dinobryon cylindricum	Dinobryon	E	1a	Ⅱ	0	0	12739
Dinobryon divergens	Dinobryon	E	1a	Ⅱ	0	0	680.556
Dinobryon bavaricum	Dinobryon	E	1a	Ⅱ	42989.2	62159.4	22578.8
Mallomonas spp.	Mallomonas	E	2a	Ⅱ	5662.73	2391.8	227.919
Chromulina spp.	Chromulina	X3	2a	Ⅱ	19471.6	19437.3	0
Chrysochromulina spp.	Chrysochromulina	X2	2a	Ⅱ	113718	57486.5	0
Ochromonas spp.	Ochromonas	X1	2a	Ⅱ	18287.4	8730.47	0
Chroomonas acuta	Chroomonas	X2	2d	Ⅴ	237103	108147	28878.2
Chroomonas caudata	Chroomonas	X3	2d	Ⅴ	0	139.836	290.047
Cryptomonas ovata	Cryptomonas	Y	2d	Ⅴ	57927	39470.6	8321.42
Cryptomonas erosa	Cryptomonas	Y	2d	Ⅴ	0	846.507	37548.3
Ceratium hirundinella	Ceratium	LM	1a	Ⅴ	1834.42	877.281	1949.27
Peridinium bipes	Peridinium	Lo	1a	Ⅴ	2924.89	907.384	918.619
Peridinium pusillum	Peridinium	Lo	1a	Ⅴ	0	0	384.242
Gymnodinium spp.	Gymnodinium	Y	1a	Ⅴ	1009.48	427.392	0
Glenodinium spp.	Glenodinium	Y	1a	Ⅴ	0	0	69.8623
Euglena spp.	Euglena	W1	1c	Ⅴ	5103.15	2250.09	1692.29
Phacus longicauda	Phacus	W1	1c	Ⅴ	296.216	71.3154	209.587
Strombomonas spp.	Strombomonas	W2	1c	Ⅴ	69.8623	0	419.174
Trachelomonas spp.	Trachelomonas	W2	1c	Ⅴ	5549.24	1630.87	3616.96
Ophiocytium capitaum	Ophiocytium	Q	10c	Ⅳ	0	0	558.898
Gonyostomum spp.	Gonyostomum	Q	1a	Ⅴ	157.19	0	1587.78
